# Supplementary material for: Parasitism of Hirsutella rhossiliensis on Different Nematodes and Its Endophytism Promoting Plant Growth and Resistance against Root-Knot Nematodes
Source: MDPI journal article supplement (doi:10.3390/jof10010068), 2024-01-15
Supplement: s1 [file s1]

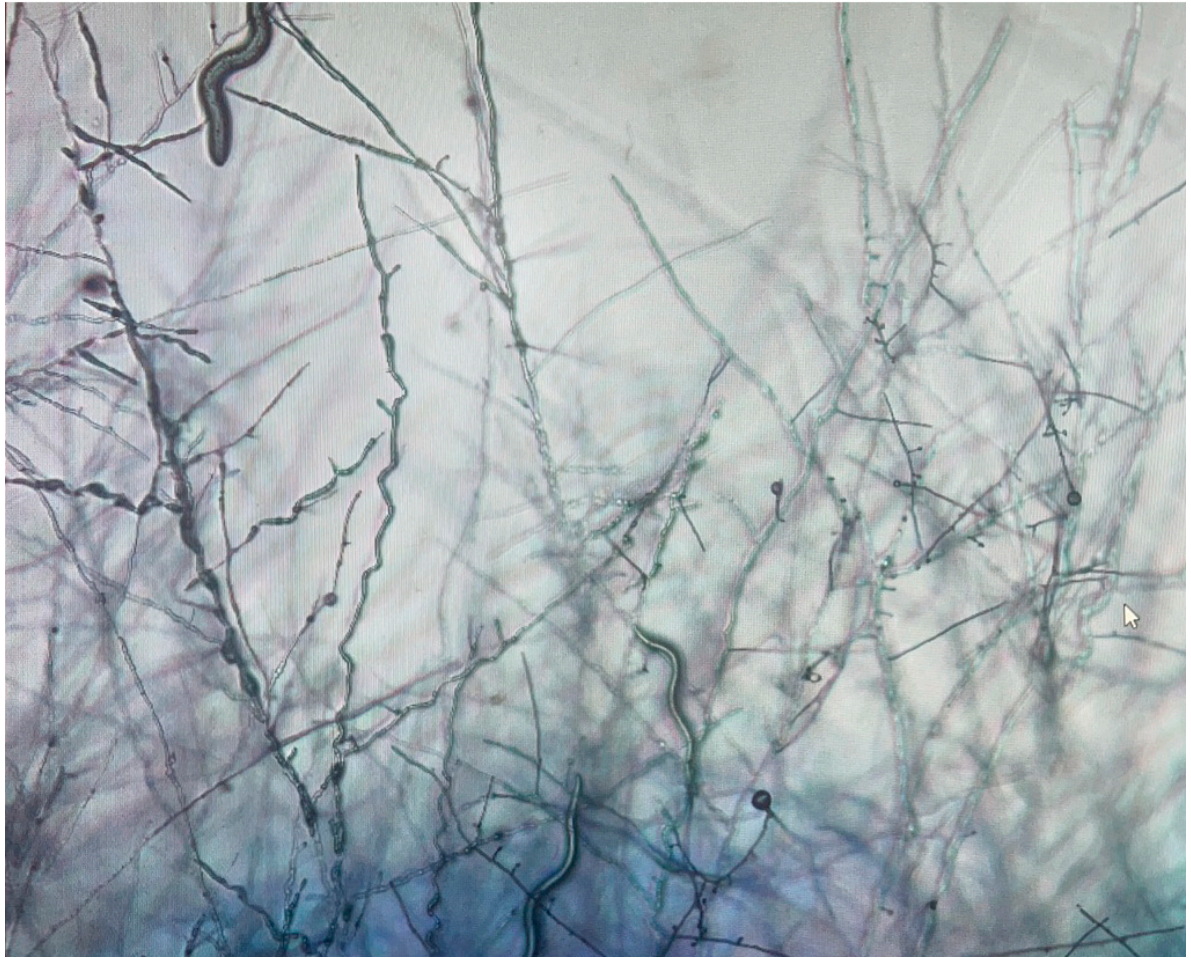

Figure S1. The root-knot nematode *M. incognita* on the fungal mat of *H. rhossiliensis* HR02. Image was taken under 10× objective lens and 10× ocular lens.

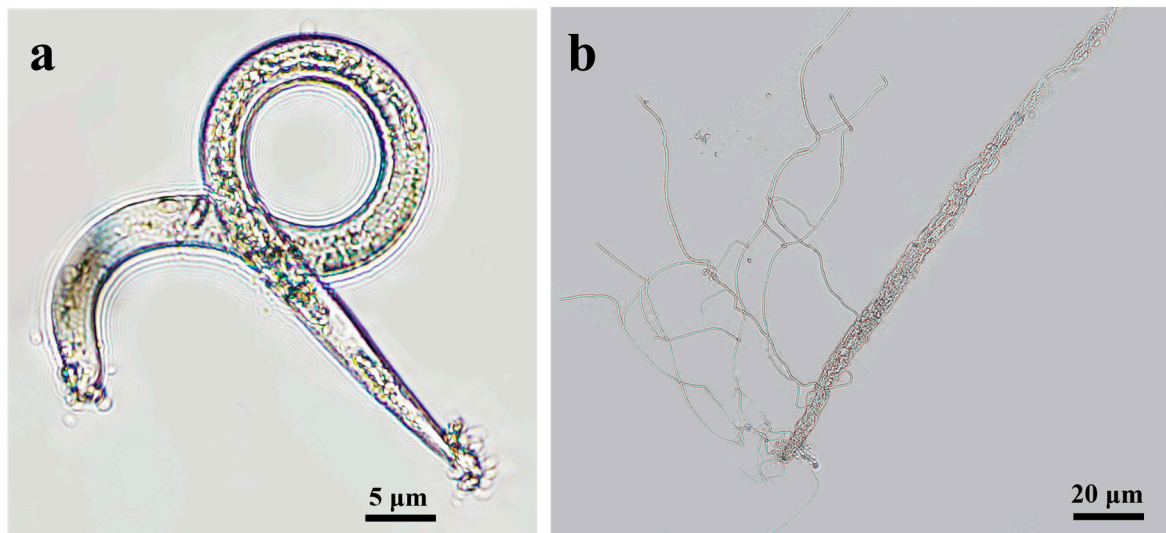

Figure S2. Infection of *H. rhossiliensis* HR02 on *M. incognita*. More conidia are gathered on the head and tail of the nematode (a) and hyphae grow out from the dead host (b).

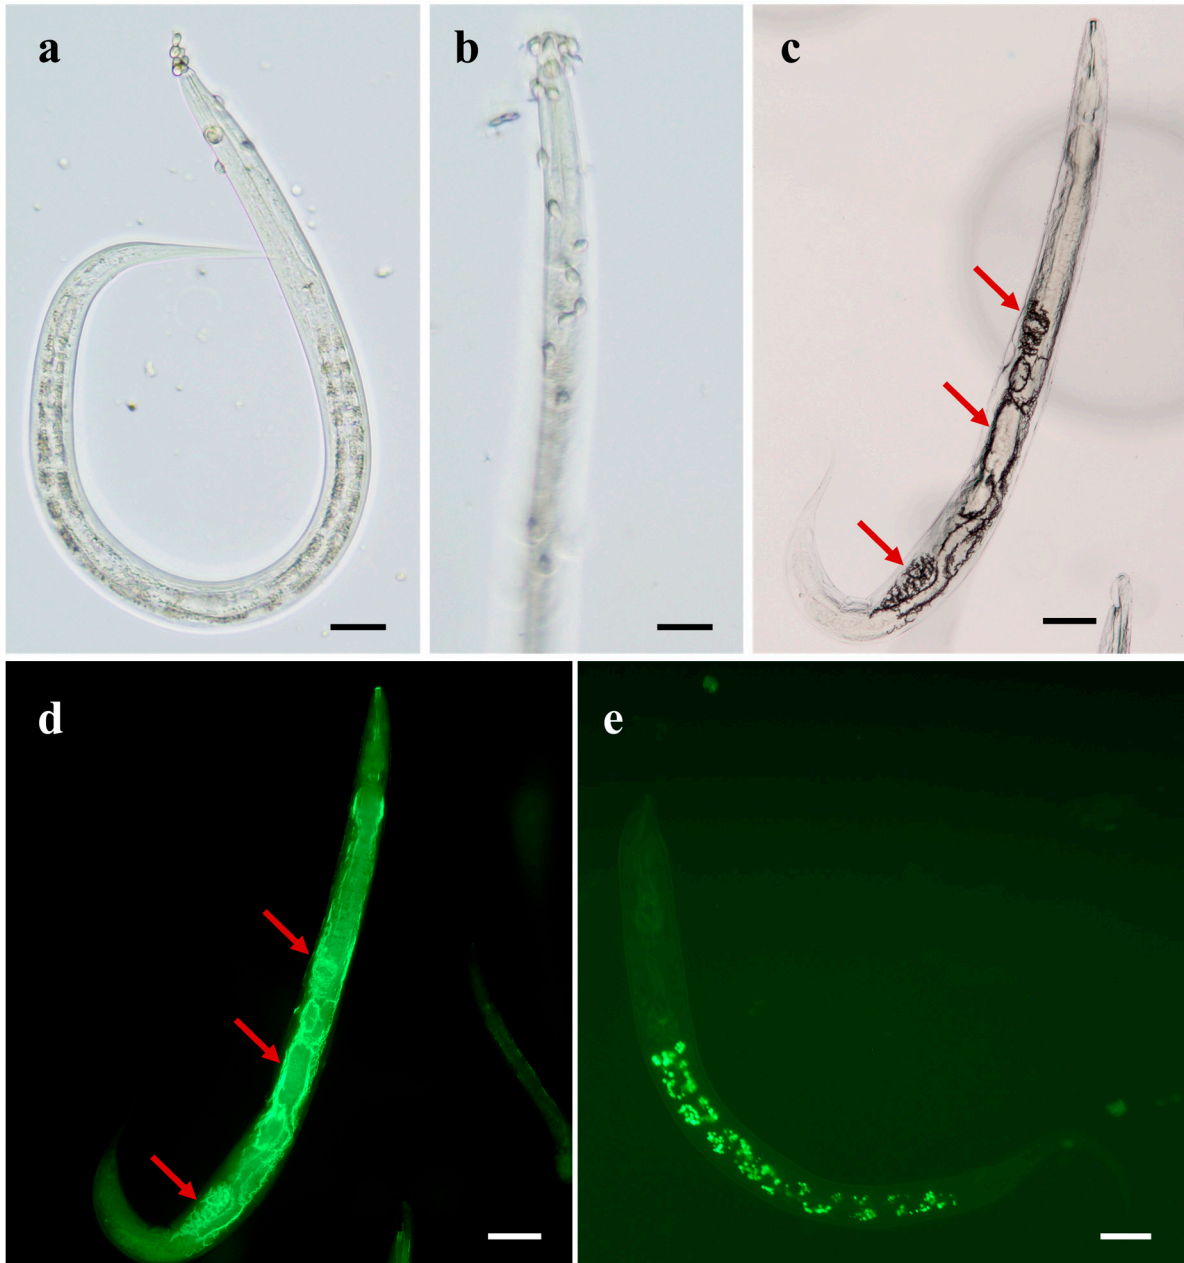

Figure S3. Infection of *H. rhossiliensis* HR02 on *C. elegans*. Conidia spores are attached to the cuticle (a); some enter into the intestine by swallowing from mouth (b); hyphae grow in the body (c); infected nematode under fluorescence condition (d); the control nematode with autofluorescence in the intestine (e).
